# Supplementary material for: Impact of an Educational Intervention on the Opioid Knowledge and Prescribing Behaviors of Resident Physicians
Source: Research Square preprint supplement (doi:10.21203/rs.3.rs-738857/v1), 2021-08-17
Supplement: Supplementary file 1 [file 10e8eb3cb75c0ea9af03513c.docx]

**Figure 1**: Correct responses to the number of deaths due to heroin overdose in 2017
